# Supplementary material
Source: publisher figshare collection journal article supplement (https://asha.figshare.com/articles/dataset/_/26543824)
Supplement: Supplementary file 1 [file 1]

**Supplemental Material S2.** Discourse measures and descriptions from the CLAN software (including duration, MLU, type-token ratio, etc.).

| <b>Discourse Measure</b> | <b>Description</b>                                                                                                                                               |
|--------------------------|------------------------------------------------------------------------------------------------------------------------------------------------------------------|
| duration                 | Duration of participant’s time talking                                                                                                                           |
| mlu utts                 | Mean length utterance in utterances; total number of utterances.                                                                                                 |
| mlu words                | Mean length utterance in words; number of words divided by utterances in the sample                                                                              |
| mlu morph                | Mean length utterance in morphemes; number of morphemes divided by utterances in the sample                                                                      |
| ttr                      | Type token ratio: total number of different word types occurring in the sample divided by the total number of words (tokens)                                     |
| words min                | Total number of words divided by duration in minutes                                                                                                             |
| verbs utt                | Total number of verbs divided by total number of utterances                                                                                                      |
| word errors              | Total number of word-level errors (e.g., semantic, phonological) in the sample                                                                                   |
| utt errors               | Total number of utterance-level errors (e.g., ungrammatical) in the sample                                                                                       |
| prop density             | Propositional idea density approximated by the number of verbs, adjectives, adverbs, prepositions, and conjunctions divided by the total number of words         |
| retracings               | Total number of full or partial reformulations of phrases in the sample                                                                                          |
| rep                      | Total number of repeated words and phrases in sample                                                                                                             |
| false starts             | Total number of false starts in sample                                                                                                                           |
| pauses                   | Total number of silent pauses in sample                                                                                                                          |
| total mazes              | Total number of filled pauses, retracings, and repetitions in the sample                                                                                         |
| nouns                    | Total number of nouns in the sample                                                                                                                              |
| pronouns                 | Total number of pronouns in the sample                                                                                                                           |
| pronoun index            | Total number of pronouns divided by nouns plus pronouns in the sample                                                                                            |
| per nouns                | All nouns divided by total words in the sample                                                                                                                   |
| per verbs                | All verbs divided by total words in the sample; includes verbs, copulas, and past or present participles (that appear with auxiliaries); does not include modals |
