# Supplementary material
Source: publisher figshare collection journal article supplement (https://asha.figshare.com/articles/dataset/_/26543824)
Supplement: Supplementary file 1 [file 1]

## Sheet: Sheet1
Supplemental material, Wilson et al., “Story Recall in Peer Conflict Resolution Discourse Task to Identify Older Adults Testing Within Range of Cognitive Impairment,” AJSLP, https://doi.org/10.1044/2024_AJSLP-24-00005
Supplemental Material S3. Full Pearson’s correlation table for the CLAN discourse measures, story recall elements recalled, percent story recall accuracy, and MoCA total scores.
Variable		'duration'	' mlu utts'	' mlu morph'	' ttr'	' words min'	' verbs utt'	' word errors'	' utt errors'	' prop density'	' retracings'	' rep'	' false starts'	' pauses'	'total mazes '	'nouns '	'pronouns '	'pronoun index '	'per nouns '	'per verbs'	'story elements recalled'	'percent story retell'	moca'
1. 'duration'	Pearson's r	—
	p-value	—
	Upper 95% CI	—
	Lower 95% CI	—
2. ' mlu utts'	Pearson's r	0.833	—
	p-value	< .001	—
	Upper 95% CI	0.892	—
	Lower 95% CI	0.745	—
3. ' mlu morph'	Pearson's r	0.29	-0.064	—
	p-value	0.013	0.589	—
	Upper 95% CI	0.488	0.168	—
	Lower 95% CI	0.065	-0.29	—
4. ' ttr'	Pearson's r	-0.68	-0.691	-0.349	—
	p-value	< .001	< .001	0.002	—
	Upper 95% CI	-0.533	-0.548	-0.129	—
	Lower 95% CI	-0.787	-0.795	-0.536	—
5. ' words min'	Pearson's r	-0.096	0.226	0.169	-0.395	—
	p-value	0.418	0.055	0.153	< .001	—
	Upper 95% CI	0.137	0.433	0.384	-0.181	—
	Lower 95% CI	-0.319	-0.005	-0.064	-0.573	—
6. ' verbs utt'	Pearson's r	0.152	-0.131	0.896	-0.36	0.221	—
	p-value	0.198	0.269	< .001	0.002	0.06	—
	Upper 95% CI	0.369	0.102	0.934	-0.141	0.429	—
	Lower 95% CI	-0.081	-0.351	0.839	-0.545	-0.01	—
7. ' word errors'	Pearson's r	0.045	0.052	0.046	-0.174	0.123	0.099	—
	p-value	0.707	0.662	0.701	0.141	0.301	0.406	—
	Upper 95% CI	0.272	0.279	0.273	0.059	0.343	0.321	—
	Lower 95% CI	-0.187	-0.18	-0.186	-0.388	-0.111	-0.134	—
8. ' utt errors'	Pearson's r	0.284	0.178	0.133	-0.114	-0.094	-0.004	-0.05	—
	p-value	0.015	0.131	0.261	0.337	0.43	0.972	0.676	—
	Upper 95% CI	0.482	0.392	0.352	0.119	0.139	0.226	0.182	—
	Lower 95% CI	0.057	-0.054	-0.1	-0.335	-0.317	-0.234	-0.277	—
9. ' prop density'	Pearson's r	0.141	0.111	0.199	-0.074	0.11	0.162	0.017	0.134	—
	p-value	0.235	0.352	0.092	0.534	0.353	0.172	0.884	0.259	—
	Upper 95% CI	0.359	0.332	0.41	0.159	0.332	0.378	0.246	0.353	—
	Lower 95% CI	-0.092	-0.123	-0.033	-0.299	-0.123	-0.071	-0.214	-0.099	—
10. ' retracings'	Pearson's r	0.734	0.704	0.134	-0.561	0.025	0.044	0.19	0.209	0.055	—
	p-value	< .001	< .001	0.259	< .001	0.837	0.711	0.107	0.077	0.643	—
	Upper 95% CI	0.825	0.804	0.353	-0.38	0.253	0.271	0.403	0.419	0.282	—
	Lower 95% CI	0.606	0.565	-0.099	-0.701	-0.207	-0.188	-0.042	-0.023	-0.177	—
11. ' rep'	Pearson's r	0.602	0.582	0.036	-0.411	-0.058	-0.005	0.051	0.05	-0.006	0.558	—
	p-value	< .001	< .001	0.76	< .001	0.625	0.964	0.665	0.675	0.961	< .001	—
	Upper 95% CI	0.731	0.716	0.264	-0.2	0.174	0.225	0.278	0.277	0.224	0.698	—
	Lower 95% CI	0.431	0.407	-0.195	-0.586	-0.284	-0.235	-0.181	-0.182	-0.236	0.376	—
12. ' false starts'	Pearson's r	0.467	0.295	0.176	-0.132	-0.141	0.038	0.008	-0.012	-0.075	0.4	0.438	—
	p-value	< .001	0.011	0.137	0.266	0.233	0.747	0.945	0.922	0.526	< .001	< .001	—
	Upper 95% CI	0.629	0.492	0.39	0.101	0.092	0.266	0.238	0.219	0.157	0.577	0.607	—
	Lower 95% CI	0.265	0.07	-0.057	-0.351	-0.36	-0.193	-0.222	-0.241	-0.3	0.187	0.232	—
13. ' pauses'	Pearson's r	0.332	0.13	0.076	-0.125	-0.333	0.016	-0.124	-0.102	-0.074	0.163	0.204	0.337	—
	p-value	0.004	0.274	0.525	0.291	0.004	0.895	0.297	0.39	0.531	0.169	0.083	0.004	—
	Upper 95% CI	0.522	0.349	0.301	0.108	-0.111	0.245	0.109	0.131	0.158	0.379	0.415	0.526	—
	Lower 95% CI	0.11	-0.103	-0.157	-0.345	-0.523	-0.215	-0.344	-0.324	-0.299	-0.07	-0.027	0.116	—
14. 'total mazes '	Pearson's r	0.778	0.668	0.162	-0.501	-0.07	0.057	0.09	0.029	0.005	0.779	0.781	0.608	0.293	—
	p-value	< .001	< .001	0.17	< .001	0.555	0.63	0.45	0.809	0.967	< .001	< .001	< .001	0.012	—
	Upper 95% CI	0.855	0.779	0.378	-0.306	0.162	0.284	0.313	0.257	0.235	0.855	0.857	0.735	0.49	—
	Lower 95% CI	0.668	0.518	-0.071	-0.656	-0.296	-0.175	-0.143	-0.203	-0.225	0.668	0.672	0.44	0.068	—
15. 'nouns '	Pearson's r	0.834	0.788	0.343	-0.689	0.256	0.136	0.018	0.285	0.176	0.552	0.418	0.314	0.138	0.55	—
	p-value	< .001	< .001	0.003	< .001	0.029	0.253	0.88	0.015	0.136	< .001	< .001	0.007	0.244	< .001	—
	Upper 95% CI	0.893	0.862	0.531	-0.545	0.459	0.355	0.247	0.483	0.39	0.694	0.591	0.507	0.357	0.692	—
	Lower 95% CI	0.747	0.682	0.122	-0.793	0.028	-0.097	-0.213	0.058	-0.056	0.369	0.208	0.09	-0.095	0.366	—
16. 'pronouns '	Pearson's r	0.83	0.856	0.221	-0.706	0.236	0.187	0.045	0.136	0.102	0.728	0.573	0.372	0.158	0.728	0.683	—
	p-value	< .001	< .001	0.06	< .001	0.044	0.114	0.704	0.252	0.392	< .001	< .001	0.001	0.181	< .001	< .001	—
	Upper 95% CI	0.89	0.907	0.429	-0.569	0.442	0.4	0.273	0.355	0.324	0.821	0.71	0.554	0.375	0.821	0.789	—
	Lower 95% CI	0.742	0.779	-0.009	-0.805	0.006	-0.045	-0.187	-0.097	-0.131	0.599	0.396	0.155	-0.075	0.598	0.537	—
17. 'pronoun index '	Pearson's r	0.192	0.258	-0.05	-0.173	0.028	0.126	0.016	-0.003	-0.03	0.275	0.212	0.102	0.029	0.251	-0.117	0.513	—
	p-value	0.103	0.028	0.677	0.143	0.816	0.287	0.891	0.982	0.803	0.019	0.071	0.392	0.808	0.032	0.324	< .001	—
	Upper 95% CI	0.405	0.46	0.183	0.059	0.256	0.346	0.245	0.228	0.202	0.475	0.422	0.324	0.257	0.455	0.116	0.664	—
	Lower 95% CI	-0.039	0.029	-0.276	-0.388	-0.204	-0.107	-0.215	-0.233	-0.258	0.048	-0.019	-0.131	-0.203	0.022	-0.338	0.32	—
18. 'per nouns '	Pearson's r	-0.187	-0.233	-0.026	0.177	-0.073	-0.175	-0.127	-0.042	-0.139	-0.235	-0.154	-0.079	0.04	-0.23	0.095	-0.393	-0.755	—
	p-value	0.114	0.047	0.83	0.133	0.54	0.14	0.284	0.721	0.242	0.046	0.192	0.507	0.734	0.05	0.426	< .001	< .001	—
	Upper 95% CI	0.045	-0.003	0.206	0.392	0.16	0.058	0.106	0.189	0.094	-0.005	0.079	0.154	0.268	-16.68	0.318	-0.18	-0.635	—
	Lower 95% CI	-0.4	-0.44	-0.254	-0.055	-0.298	-0.389	-0.347	-0.27	-0.357	-0.441	-0.371	-0.304	-0.191	-0.437	-0.138	-0.572	-0.839	—
19. 'per verbs'	Pearson's r	-0.372	-0.194	-0.371	0.187	0.043	-0.049	0.07	-0.495	-0.189	-0.201	-0.038	-0.142	-0.187	-0.162	-0.502	-0.126	0.399	-0.301	—
	p-value	0.001	0.099	0.001	0.114	0.716	0.679	0.555	< .001	0.11	0.088	0.75	0.23	0.114	0.172	< .001	0.29	< .001	0.01	—
	Upper 95% CI	-0.155	0.037	-0.154	0.4	0.271	0.183	0.296	-0.299	0.043	0.03	0.194	0.091	0.045	0.071	-0.307	0.108	0.577	-0.076	—
	Lower 95% CI	-0.554	-0.406	-0.553	-0.045	-0.189	-0.276	-0.162	-0.651	-0.401	-0.412	-0.266	-0.361	-0.4	-0.378	-0.656	-0.346	0.186	-0.496	—
20. 'story elements recalled'	Pearson's r	0.042	0.032	0.162	-0.082	0.096	0.141	-0.023	0.103	-0.036	-0.089	-0.215	-0.149	0.134	-0.059	0.16	0.024	-0.1	0.077	-0.203	—
	p-value	0.722	0.786	0.172	0.492	0.419	0.235	0.85	0.388	0.765	0.455	0.068	0.208	0.259	0.617	0.176	0.84	0.4	0.516	0.086	—
	Upper 95% CI	0.27	0.26	0.378	0.151	0.319	0.359	0.209	0.325	0.196	0.144	0.016	0.084	0.353	0.173	0.376	0.253	0.133	0.302	0.029	—
	Lower 95% CI	-0.19	-0.199	-0.071	-0.306	-0.137	-0.092	-0.251	-0.131	-0.264	-0.312	-0.424	-0.367	-0.099	-0.286	-0.073	-0.207	-0.323	-0.156	-0.413	—
21. 'percent story retell'	Pearson's r	0.042	0.032	0.162	-0.082	0.096	0.141	-0.023	0.103	-0.036	-0.089	-0.215	-0.149	0.134	-0.059	0.16	0.024	-0.1	0.077	-0.203	1	—
	p-value	0.722	0.786	0.172	0.492	0.419	0.235	0.85	0.388	0.765	0.455	0.068	0.208	0.259	0.617	0.176	0.84	0.4	0.516	0.086	< .001	—
	Upper 95% CI	0.27	0.26	0.378	0.151	0.319	0.359	0.209	0.325	0.196	0.144	0.016	0.084	0.353	0.173	0.376	0.253	0.133	0.302	0.029	1	—
	Lower 95% CI	-0.19	-0.199	-0.071	-0.306	-0.137	-0.092	-0.251	-0.131	-0.264	-0.312	-0.424	-0.367	-0.099	-0.286	-0.073	-0.207	-0.323	-0.156	-0.413	1	—
22. moca'	Pearson's r	0.11	0.01	0.29	0.049	-0.002	0.167	-0.098	0.104	0.082	-0.026	-0.087	0.072	0.014	-0.01	0.206	0.013	-0.278	0.099	-0.348	0.316	0.316	—
	p-value	0.354	0.933	0.013	0.68	0.984	0.158	0.411	0.381	0.493	0.83	0.465	0.546	0.904	0.934	0.08	0.91	0.017	0.406	0.003	0.006	0.006	—
	Upper 95% CI	0.332	0.24	0.487	0.276	0.228	0.382	0.135	0.326	0.306	0.206	0.146	0.297	0.244	0.221	0.417	0.243	-0.052	0.322	-0.128	0.509	0.509	—
	Lower 95% CI	-0.123	-0.221	0.064	-0.183	-0.232	-0.066	-0.321	-0.129	-0.151	-0.254	-0.311	-0.161	-0.216	-0.239	-0.025	-0.217	-0.478	-0.134	-0.535	0.093	0.093	—
