# Supplementary material
Source: publisher figshare collection journal article supplement (https://asha.figshare.com/articles/dataset/_/26543824)
Supplement: Supplementary file 2 [file 1]

**Supplemental Material S1.** Individual participants' demographics (including age, sex, race, education, ethnicity), MoCA total scores, and MoCA Memory Index Scores.

| <b>Age</b> | <b>Sex</b> | <b>Race</b> | <b>Education</b> | <b>Ethnicity</b> | <b>Economic Category</b> | <b>MoCA Total Score</b> | <b>MoCA MIS Score</b> |
|------------|------------|-------------|------------------|------------------|--------------------------|-------------------------|-----------------------|
| 61         | 1          | 5           | 6                | 0                | 3                        | 19                      | 6                     |
| 69         | 2          | 5           | 5                | 0                | 1                        | 19                      | 12                    |
| 61         | 1          | 3           | 3                | 0                | 1                        | 19                      | 8                     |
| 66         | 2          | 3           | 5                | 0                | 3                        | 20                      | 1                     |
| 69         | 2          | 3           | 3                | 0                | 3                        | 21                      | 11                    |
| 62         | 2          | 3           | 3                | 0                | 1                        | 21                      | 8                     |
| 71         | 2          | 1           | 5                | 0                | 2                        | 21                      | 10                    |
| 60         | 1          | 3           | 5                | 0                | 1                        | 22                      | 8                     |
| 75         | 2          | 5           | 5                | 0                | 3                        | 23                      | 6                     |
| 62         | 2          | 5           | 3                | 0                | 2                        | 23                      | 7                     |
| 72         | 2          | 5           | 3                | 0                | 3                        | 23                      | 9                     |
| 61         | 2          | 3           | 6                | 0                | 2                        | 23                      | 14                    |
| 77         | 2          | 5           | 3                | 0                | 1                        | 24                      | 7                     |
| 61         | 2          | 5           | 5                | 0                | 3                        | 24                      | 8                     |
| 71         | 2          | 3           | 6                | 0                | 2                        | 24                      | 13                    |
| 65         | 1          | 5           | 6                | 0                | 2                        | 24                      | 10                    |
| 65         | 1          | 3           | 5                | 0                | 2                        | 24                      | 13                    |
| 63         | 2          | 3           | 5                | 0                | 2                        | 24                      | 14                    |
| 79         | 1          | 5           | 6                | 0                | 3                        | 24                      | 6                     |
| 69         | 2          | 3           | 5                | 0                | 1                        | 24                      | 10                    |
| 78         | 2          | 5           | 6                | 0                | 3                        | 24                      | 12                    |
| 66         | 1          | 5           | 3                | 0                | 3                        | 24                      | 9                     |
| 71         | 1          | 5           | 5                | 1                | 2                        | 24                      | 8                     |
| 70         | 2          | 5           | 4                | 0                | 2                        | 24                      | 15                    |
| 65         | 2          | 5           | 3                | 0                | 2                        | 25                      | 5                     |
| 60         | 2          | 3           | 5                | 0                | 2                        | 25                      | 12                    |
| 74         | 1          | 5           | 6                | 0                | 3                        | 25                      | 4                     |
| 61         | 1          | 5           | 5                | 0                | 3                        | 25                      | 10                    |
| 62         | 2          | 5           | 5                | 0                | 2                        | 25                      | 7                     |
| 70         | 2          | 3           | 6                | 0                | 2                        | 25                      | 12                    |
| 71         | 1          | 5           | 5                | 0                | 2                        | 25                      | 5                     |
| 61         | 2          | 5           | 5                | 0                | 2                        | 25                      | 13                    |
| 69         | 2          | 3           | 5                | 0                | 2                        | 25                      | 13                    |
| 69         | 1          | 5           | 6                | 0                | 2                        | 25                      | 10                    |
| 61         | 2          | 5           | 6                | 0                | 2                        | 25                      | 9                     |

|    |   |   |   |   |     |    |    |
|----|---|---|---|---|-----|----|----|
| 63 | 2 | 5 | 6 | 0 | 3   | 25 | 14 |
| 75 | 2 | 5 | 3 | 0 | 2   | 26 | 11 |
| 75 | 2 | 5 | 6 | 0 | 2   | 26 | 15 |
| 66 | 2 | 3 | 3 | 0 | 2   | 26 | 13 |
| 66 | 1 | 5 | 5 | 0 | 2   | 26 | 9  |
| 61 | 2 | 5 | 6 | 0 | 2   | 26 | 11 |
| 72 | 2 | 3 | 5 | 0 | 2   | 26 | 13 |
| 73 | 1 | 5 | 6 | 0 | 2   | 26 | 13 |
| 65 | 2 | 5 | 5 | 0 | 3   | 27 | 13 |
| 62 | 2 | 3 | 6 | 0 | 2   | 27 | 12 |
| 66 | 2 | 5 | 3 | 0 | 2   | 27 | 11 |
| 64 | 2 | 5 | 5 | 0 | 3   | 27 | 15 |
| 77 | 2 | 5 | 6 | 0 | 3   | 27 | 15 |
| 69 | 2 | 5 | 5 | 0 | 3   | 27 | 13 |
| 64 | 2 | 5 | 6 | 0 | 2   | 27 | 15 |
| 65 | 2 | 5 | 5 | 0 | 2   | 28 | 13 |
| 61 | 2 | 5 | 5 | 0 | 2   | 28 | 12 |
| 69 | 2 | 5 | 3 | 0 | 2   | 28 | 14 |
| 63 | 1 | 5 | 5 | 0 | 3   | 28 | 13 |
| 67 | 1 | 5 | 5 | 0 | 1   | 28 | 15 |
| 60 | 2 | 3 | 5 | 0 | 2   | 28 | 14 |
| 73 | 1 | 5 | 6 | 0 | 2   | 29 | 14 |
| 65 | 1 | 5 | 3 | 0 | 2   | 29 | 14 |
| 69 | 2 | 5 | 5 | 0 | 3   | 29 | 14 |
| 68 | 2 | 5 | 3 | 0 | 2   | 29 | 15 |
| 70 | 2 | 5 | 6 | 0 | 3   | 29 | 15 |
| 67 | 1 | 5 | 3 | 0 | 2   | 29 | 14 |
| 69 | 2 | 5 | 6 | 0 | N/A | 29 | 15 |
| 70 | 2 | 5 | 6 | 0 | 3   | 29 | 15 |
| 71 | 2 | 5 | 5 | 0 | 2   | 29 | 15 |
| 62 | 1 | 5 | 3 | 0 | 3   | 29 | 15 |
| 62 | 2 | 5 | 5 | 0 | 2   | 30 | 15 |
| 64 | 2 | 5 | 6 | 0 | 2   | 30 | 15 |
| 63 | 2 | 5 | 5 | 0 | 3   | 30 | 15 |
| 69 | 2 | 5 | 6 | 0 | 3   | 30 | 15 |
| 71 | 1 | 5 | 6 | 0 | 3   | 30 | 15 |
| 72 | 2 | 5 | 6 | 0 | 3   | 30 | 15 |
| 63 | 1 | 5 | 5 | 0 | 2   | 30 | 15 |

*Note.* N/A = prefer not to answer. Sex: 1 = male; 2 = female. Race: 1 = American Indian or Alaskan Native; 2 = Asian; 3 = Black or African American; 4 = Native Hawaiian or Pacific

---

Islander; 5 = White; 6 = Other. Education: 0 = below 7th grade; 1 = completed 9th grade; 2 = completed 10th or 11th grade; 3 = completed high school; 4 = completed at least one year of college or specialized training; 5 = completed college/university; 6 = completed graduate school; 7 = other. Ethnicity: 0 = not Hispanic; 1 = Hispanic or Latino. Economic category: 1 = low; 2 = middle; 3 = high. MoCA total score out of 30 points; MoCA MIS out of 15 points (Nasreddine et al., 2005).

---
